# Supplementary material for: Measuring What Matters—A Holistic Approach to Measuring Well-Being in Endometriosis
Source: Front Glob Womens Health. 2021 Dec 21;2:770366. doi: 10.3389/fgwh.2021.770366 (PMC8724039; doi:10.3389/fgwh.2021.770366)
Supplement: Supplementary file 1 [file Table_1.XLSX]

## Sheet: Table 1
Review	Number of studies	Type of studies included	Aim	Primary outcome measure	Instrument used to measure primary outcome	Validated QoL instrument used
Sallam et al. (2006)	3	RCTs	To determine the effectiveness of administering GnRH agonists for three to six months prior to in vitro-fertilisation (IVF) or intracytoplasmic sperm injection (ICSI) in women with endometriosis.	Live birth rate per couple/woman where pregnancy reached beyond 24 weeks.	N/A	Not used
Hughes et al. (2007)	25	RCTs	To assess the effectiveness of ovulation suppression agents, including danazol, progestins and oral contraceptives, in the treatment of endometriosis-associated subfertility in improving pregnancy outcomes including live births.	Live birth rate where pregnancy reached beyond 20 weeks.	N/A	Not used
Georgiou et al. (2019)	8	RCTs	To determine the effectiveness and safety of long-term gonadotrophin-releasing hormone (GnRH) agonist therapy before standard in vitro fertilisation (IVF) or intracytoplasmic sperm injection (ICSI) in women with endometriosis.	1) Live birth rate	N/A	Not used
				2) Complication rate	N/A
Benschop et al. (2010)	4	RCTs	To determine the effectiveness and safety of surgery, medical treatment, combination therapy or no treatment for improving reproductive outcomes among women with endometriomata, prior to undergoing assisted reproductive techniques.	1) Live birth rate, where pregnancy reached beyond 20 weeks	N/A	Not used
				2) Adverse outcomes	N/A
Brown et al. (2017)	2	RCTs, Cross-Over trials	To assess the effects of NSAIDs used for management of pain in women with endometriosis compared with placebo, other NSAIDS, other pain management drugs or no treatment.	1) Relief of painful symptoms	VAS and Dichotomous outcomes	Not used
				2) Adverse outcomes	N/A
Abou-Setta et al. (2013)	3	RCTs	To determine whether postoperative LNG-IUD insertion in women with endometriosis improves pain and reduces recurrence of symptoms compared with no postoperative treatment, postoperative insertion of a placebo, or postoperative therapy.	Recurrence of painful symtpms	VAS, Modified Biberoglu and Behrman rating scale and TESP	Not used
Farquar et al. (2007)	5	RCTs	To determine the effectiveness of danazol compared to placebo or no treatment in the treatment of the symptoms and signs, other than infertility, of endometriosis in women of reproductive age.	1) Pain	4 point scale using dichotomous outcomes (Symptom absent, Slight symptoms, Moderate symptoms, Severe symptoms)	Not used
				2) Recurrence	AFS score at repeat laparoscopy
				3) Patient satisfaction	Not specified
				4) Adverse outcomes	N/A
Al Kadri et al. (2009)	2	RCTs	To look at pain and disease recurrence in women with endometriosis who used hormone therapy for post-surgical menopause.	Pain	Pain questionnaire (not specified)	Not used
Brown et al. (2012)	13	RCTs	To determine the effectiveness of both the progestagens and anti-progestagens in the treatment of painful symptoms ascribed to the diagnosis of endometriosis.	1)Relief of any or all symptoms	VAS and Dichotomous outcomes	Not used
				2) Resolution of endometriotic deposits	AFS score at repeat laparoscopy
Chen et al. (2020)	25	RCTs	To determine the effectiveness of medical therapies for hormonal suppression before, after, or both before and after surgery for endometriosis for improving painful symptoms, reducing disease recurrence, and increasing pregnancy rates.	1) Relief of painful symptoms	VAS and Dichotomous outcomes	Not used
				2) Recurrence of disease	rAFS score, rASRM score, EEC
Brown et al. (2018)	3	RCTs	To determine the effectiveness, safety and cost-effectiveness of oral contraceptive preparations in the treatment of painful symptoms ascribed to the diagnosis of laparoscopically proven endometriosis.	Pain	VAS, VRS	Not used
Flower et al. (2012)	2	RCTs	To review the effectiveness and safety of Chinese herbal medicine in alleviating endometriosis-related pain and infertility.	Relief of painful symptoms	Chinese Validated outcomes	Not used
Fu et al. (2017)	10	RCTs	To assess the effectiveness and safety of Progesterone Receptor Modulators primarily in terms of pain relief as compared with other treatments or placebo or no treatment in women of reproductive age with endometriosis.	1) Relief of painful symptoms	VAS and Dichotomous outcomes	Not used	SF-36 (secondary outcome)
				2) Side effects of treatment	N/A
Zhu et al. (2011)	1	RCTs	To determine the effectiveness and safety of acupuncture for pain in endometriosis.	Relief of painful symptoms	15-point Guideline for Clinical Research on New Chinese Medicine for Treatment of Pelvic Endometriosis scale	Not used	SF-36 (secondary outcome)
Lu et al. (2013)	1	RCTs	To determine the effectiveness and safety of anti-tumour necrosis factor-α (anti-TNF-α) treatment in the management of endometriosis in premenopausal women.	1) Relief of painful symptoms	VAS and Biberoglu and Behrman rating scale,
				2) Adverse outcomes	N/A	Not used
Brown et al. (2010)	42	RCTs	To determine the effectiveness and safety of GnRH analogues in the treatment of the painful symptoms associated with endometriosis.	Relief of painful symptoms	ESSS, VAS and Dichotomous outcomes	Not used
Balfort et al. (2020)	14	RCTs	To assess the effectiveness and safety of laparoscopic surgery in the treatment of pain and infertility associated with endometriosis.	1) Overall pain	VAS	Not used	EQ-5D index summary, SF-12, EHP-30 (secondary outcome)
				2) Live birth rate	N/A
Hart et al. (2008)	3	RCTs	o determine the most effective technique for treating an ovarian endometrioma, either excision of the cyst capsule or drainage and electrocoagulation of the cyst wall, measuring the outcomes improvement in pain symptoms and fertility.	1) Relief of pelvic pain	VAS and Dichotomous outcomes	Not used
				2) Pregnancy rate	N/A
Lu et al. (2012)	4	RCTs	To assess the effects of pentoxifylline, which has anti-inflammatory effects, in subfertile, premenopausal women for the management of endometriosis.	1) Relief of painful symptoms	VAS	Not used
				2) Live birth rate	N/A
Brown and Farquhar (2014)	17	Systematic reviews	To summarise the evidence from Cochrane systematic reviews on treatment options for women with pain or subfertility associated with endometriosis.	1) Relief of painful symptoms	VAS, Biberoglu and Behrman rating scale, Dichotomous outcomes, Chinese validated outcomes, 15-point Guideline for Clinical Research on New Chinese Medicine for Treatment of Pelvic Endometriosis scale, ESSS.	Not used
				2) Pregnancy (inc Live birth, clinical pregnancy, miscarriage)	N/A
				3) Adverse events	N/A
Key
VAS	Visual analogue scale
TESP	Total endometriosis severity profile
AFS score	American Fertility Society score
rAFS score	Revised American Fertility Society score
rASRM score	Revised American Society for Reproductive Medicine score
EEC	Endoscopic Endometriosis Classification
VRS	Verbally reported scale
ESSS	Endometriosis symptom severity score
